# Supplementary material
Source: PubMed Central journal article supplement (PMC4310652)
Supplement: ASN.2013101092_ASN2013101092SupplementaryData.pdf [file ASN.2013101092_ASN2013101092SupplementaryData.pdf]

## 3' RACE

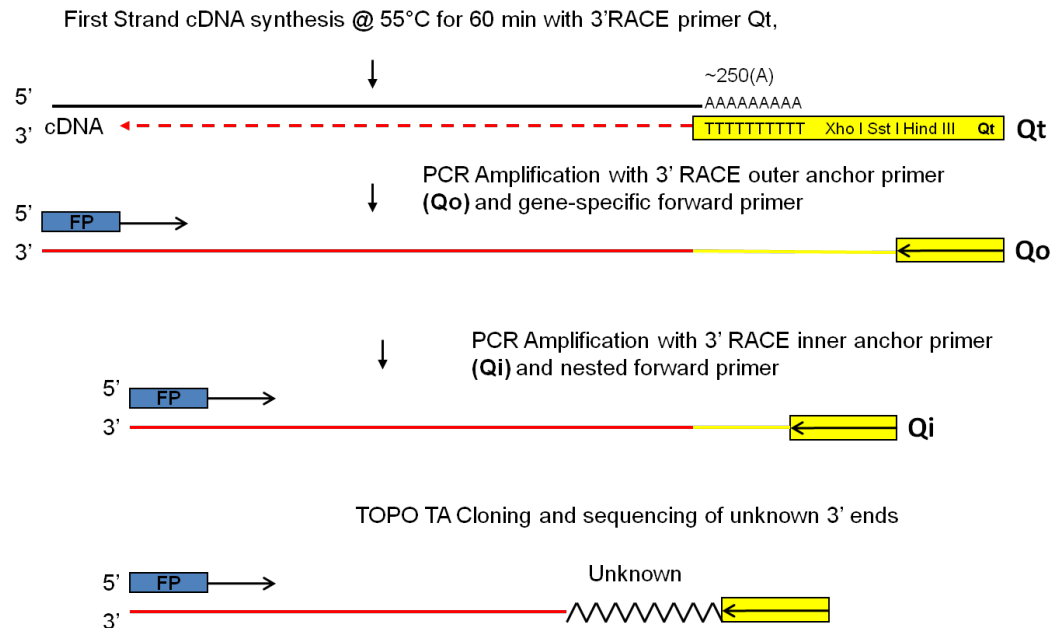

**Supplemental Figure 1. Schematic of 3' RACE.** cDNA synthesis was carried out with a specialized **Qt** primer, that contains a poly(dT) stretch for poly(A) binding which is preceded by restriction enzyme sites and a unique adapter sequence. An 'outer' race (**Qo**) primer was used in the first round of PCR amplification and a gene-specific forward primer. A second round of PCR is required to increase specificity, with a nested forward primer and the (**Qi**) 'inner' anchor primer. The many registers in which the **Qt** primer can bind the poly(A) give rise to a heterogenous population of PCR products, which requires cloning of a singular PCR product before sequencing.

# Genomic sequence for the PRTN3 gene

GCCTCCACCACACTCCATGCCAGGAGCTCCCTTTTCGTGACAGCCACAGGTGTCCTCAGACCTCGCCAGGGTCCCTTG  
 GGGGCAGAATCACCTCTTGATTGAGAATCCTGGCCTTAAAGGGGGAAGAAAACCCCCAGACAAAACCTGGCAGGAGGAT  
 GTTCGCTGGGGCCTCAGGTGAGGCACTGAGGGCACTCGTGGTGGGGCCTGCCTTCCCAGCTCTGCATCCTGTCCCC  
 TGCTACGTCCTGTGTCTGTCCTTTCCAGCTCACCCACCCACGGGACACACCTGCCACGGCCGGCTTTGCTGGGGCC  
 ACAGGGACCTCGTCAGGGAGGCGTCTCCTTTGTTGGGTGGCACGTGGGCATGTGTTGCTCTGAGGGCTGTGGCCATGTTG  
 CCCACCTGGCCAGGGACCCCGACTTGGGTGGGTGACAGCCAGCTCCCCGCCCCACAAAGGTTGGGACCTTGAGCC  
 CAAAGCCCCACCTCCTCCCCGGAGTCCGTTCTGACTCCAGGCTCCAAAGGCAAAAGGAGGAAGTGGGGACCCAGCC  
 TGGGCATTGGGCAACTCAACGGCCTCTGGCATTGGGCTATAAGAGGAGCTTGACCGTGGGTGCACCCTGGACCCCA  
CCATGGCTCACCGGGCCCCAGCCCTGCCCTGGCGTCCGTGCTGCTGGCCTTGCTGCTGAGCGGTGAGTGAAGCA  
 CGTGCCCATCCATCCAGCTCCAGGCCCGGTGGATTGTGGGAAATATCCACCACGAGGTCCATCCAAAGCCCTTCT  
 GGACAGCTGGGGAAACTGAGGCAGGGTCAAGGGGAGACTCCACTCACTGCTCGGGACCAACGCTTGACGGGGTGGGGA  
 GGACAAGGGCAAGGGGAGCCCTGGCCATTTGACTCAGTTGCCATCTGTAAACCGGGCAAAACCCAGCCCTTCCCTC  
 CTGAGGAGGTGTTTTGGGAATTAGCTAGTAACAGGCGAATTCCCTGGACAGCACCCAGCCTTACGCAAAATGCTCAGTGA  
 ATATGCATGAATGAATGAATGAGTGAATGAATGAGTGAATGAGTGAATGAGTGAACAAATGAATGAGTGAATGAATCA  
 ATGAGTGAATGAATGAGTGAATGAGTGAATGAGTGAACGAATGAATGAGTGAATGAATCAATGAGTGAATGAAT  
 GAATGAGTGAATGAGTGAATGAGTGAATGAGTGAATGAGTGAACGAATGAATGAGTGAATGAATGAATGAATGAGTGA  
 GTGAGTGAAGGGTTCGAGGAGTTAGTGAATGCTGGAATCAGGGGAAGAAGAGAGCATGGGCCCTCAGTCCCTATCC  
 TGAGGGTGAATTTCTTTTTCTTTTTCTTTTTTTTTTTTTTTTGGCTGGATAATTTTTTGTAAATTTTTGTAGAGACGGGT  
 TTCAAGGTGTTAGCCAGGATGGTCTCGATCTCCTGACTTCGTGATCCGCTGCCTCAGCCTCCCAAAGTGTGGGATT  
 ACAGGCGTGAGCCACCGCCTGGCCCTTTTTTTTCTTTTTTGAACGAATCTGCTCTGTGCCACAGGCTGGAGT  
 GCAGTGGTCAATCTCAGTTACTGACAGCTCAGCCTCCTGGGTCAATGATTTCTCTGCCTCCGCTCTTGAGTAG  
 CTGGGATTACAAGCACACACCACACCTGGCTAGTTTTTGTATTTTTTAGTAGAGATGGGGTTTACCACGTTGGTC  
 AGGCTGGTCTGAACTCCTGACCTGAGGGGGATTTCAATGCCCTCAGTTTGTTCATCTGCAAAATGGGTCTCTTTGTT  
 GGCTGATTTTTTTTTTTTTTTTTTGGCTTCTTTTTTTTTATTTTGTGTTTGTGTTTTTTGAGATGGGGTCTCACTCA  
 GGATGAGCCACTGCGCCAGGATTTTTTTTTTTTTTTTTTTTTTGGACAGAATCTCACTCTGTTGCCAGGCTG  
 GAGTGCAGTGGTGTGATCTCGGCTCACTGCAACCTGTGCTCCTGGGTCAAGCGATTCTCTGCCTCAGCCTCCAG  
 CGAGCTGAGATTACAGGTGCGAACCACACCTGGCTAATTTTTTTTTTTTTTTTTTTTGGAGACGGAGTGTCAATCT  
 GTTGCCAGGCTGGAGTGCAGTGGGGCGATCTTGCTCACCACAACTCCGCTTCTCGGGTCAAGCGATTCTCCTCGC  
 TCAACCTCCGAGTAGCTGGGACTACAGGCAGTGCACCACGCCCAGCTAATGTTGTATTTTTTAGTAGACAGGG  
 TTTACCATGTTGGCCAGGATGGTCTCCATCTCTTGACCTCAGGTGATCCACCACCTCGGCTCCCAAAGTATTGGG  
 ATTACAGGCGTGGGCCAACCGCACCCGACCAATTTTTCTTTAAAAACATTTTTTTAAATTTTGTTTTAGAGACAGGGT  
 CTTGCTCTGTTGCCAGGCTGGAGTGCAGTGGTGTGATCTCAGTTCACTGCAGCCTTGACCTCCTGGGCTCAAGCGAT  
 CCTCCCTCCTCAGCTCCCAAGTAGCTGGGACGACAGGTGCACACCACCATGCCTGGCTAATTTTTAAATTTTTTGT  
 GAGATGGGGTCTCACAATTTGCCCAGGCTGGTCTTGAACCTCTGAGCTCAAGGGAGCCTCCTGCCTCGGCTCCCA  
 AAGTGTGGGATTACAGGCGTGCAGCCACTGCACCAGCCACCTGGTCTGCGTCTAAAAAGCCTTCTGACTCTCAGGA  
 CTGAAAGCTGCCACCAGGGCGCCTTTGGAATCGTCTGAATATAACCCCCCGGCCTGGGCGCTGAGTCTTCCCAC  
 CAGCCAGCAGGCACTGACCGGGTTCAGATCGGGAGACGGAGGCTCGGAGAGGCCAGGGGCTGCTTGCAT  
 CCCCCCTTCCCTGCAGCTGGGGCTCCCTGACGCCTGGACTCCCCCTGCAGGTGCTGCCGAGCTGGCGGATC  
GTGGCGGGTACGAGGCGCACACTCCCGCCCTCAGATGGCTCCCTGAGATCGGGGGAAACCCGGCACCCAC  
TTCTGCGGAGGCACCTTGATCCACCCAGCTTCGTGCTGACGGCCGCGCACTGCCTGCGGGACATGTGAGCGGC  
 CGCTCCACACCCCTGTCCGCCCGCCCGCCCTCTCCTCCAGCCCTGGCCGGCCACTGTCCCTCTGCCCGGGGAGG  
 ACCAGCTAAGCCCGTCTGCAGACCCAGCCCGCGCGCTGGGAGTTCTGGGGGAGGCCGGGGCAGGGTCCG  
 CGAGGGAGGGTCTGGGGCTGCACCGCGCCTCGGAAGGGCGCGCTGTGGGCGCGCGAGTGTCCAGGGCGCCGAG  
 GAGTGACACCCACCCCGCAGACCCAGCGCCTGGTGAACGTGGTGCCTCGGAGCCCAACAAGTGCGGACGC  
AGGAGCCACCCAGCAGCACTTCTCGTGGCTCAGGTGTTCTGAACAACACTACGACCGGAGAACAACTGAACGACG  
TTCTCTCATCAGGTGGCGGGGACGGGCGCGAGGGCTCGGAGGGGCAGGCCAGAGGCTCCGGGACCCCATTC  
 TGACGCCAGCATTATTGAGCACCCACTGTATACCGGGCCACGACCGAGGCGCTGCAGCCTGGGTCCAGTGGCACTG  
 CCGGGGGAGACCGCTCCTTGACACCAGGCCACTCCTCCTCCCCGCC

PR3 promotor region

Exon 1 (red)  
PR3 FP underlined

Intron I  
PR3-002  
FP underlined (green)

Exon 2  
PR3 RP underlined  
Intron II (spliced out)

Exon 3  
PR3-002  
RP (green)

## Supplemental Figure 2, Continued

### **A detailed description of the RT-PCR Protocol used to detect PR3 mRNA versus PRTN3-002 mRNA.**

- 1) *PR3* forward primer sequence resides in exon 1 (5'-CCC ACC ATG GCT CAC-3') and reverse primer in exon 2 (5'-CAA GGT GCC TCC GCA GAA-3') producing a 188 nt amplicon.
- 2) *PRTN3-002* forward primer sequence resides in intron 1 (5'-GTTGCAGATCGGGAGACG-3') and reverse primer in exon 3 (5'-GTTCTCCGCGTCGTAGTTGT-3') producing a 298 nt amplicon.
- 3) Full length transcript amplification for *PR3* FP( 5'- GACCCACCATGGCTCAC-3') and *PRTN3-2* (5'-GTTGCAGATCGGGAGACG-3'). The same reverse primer was used for both 5'-GGAGTTTCAACGTTTATTGAGGTCAC-3'.
- 4) Primer sequences for cyclophilin were - forward primer 5'- AGG CAG GAA AAG CAA GGA GCCA-3' and reverse primer RP 5'- TCACTGCAGGTAGTCTGCGCC-3'.

### **Detailed RT-PCR protocol**

The reverse transcription (RT) reaction was performed on 600 ng of mRNA in a 15 µl reaction of 0.75 µl of SS III Reverse Transcriptase, 0.75 µl of 10mM dNTPs, 0.2 µl of random hexamer primer (IDT Tech), 0.75 µl of DTT, 3 µl of 5xFS buffer, 1.5 µl of DMSO, 1.5 µl of Betaine, and 0.5 µl of RNasin Plus RNase inhibitor. Random hexamers, dNTPs, and mRNA were heated (65°C/ 5 minutes) and cooled immediately (4°C/ 5 minutes) before addition of the remaining reagents. RT conditions for all templates were 50 minutes at 50.0°C, 5 minutes at 60.0°C, 5 minutes at 65.0°C, 5 minutes at 85.0°C, and 4°C. A 50 µL PCR reaction was performed with 10 µl of 5xGC PCR Buffer, 1 µl of 10 mM dNTPs, 1 µl each of 10 µM forward and reverse primers (IDT Tech), 0.5 µl of Phusion Hot Start DNA polymerase (Finnzymes), 2.5 µl DMSO, 30 µl of nuclease free water, and 4 µl of cDNA from the reverse transcription reaction. Thermal cycler profile was 2 minutes at 98 °C, "touchdown" PCR for 10 cycles (98°C, 20 seconds; 68°C, 30 seconds, decreasing by 1°C per cycle; 72°C, 30 seconds), followed by 25 cycles (98°C, 20 seconds; 58°C, 30 seconds; 72°C, 30 seconds), with a final 5 minute extension at 72°C. Product was analyzed by agarose gel electrophoresis. PCR primer sequences were generated by Primer3 (v. 0.4.0) online tool.

### Supplemental Figure 3

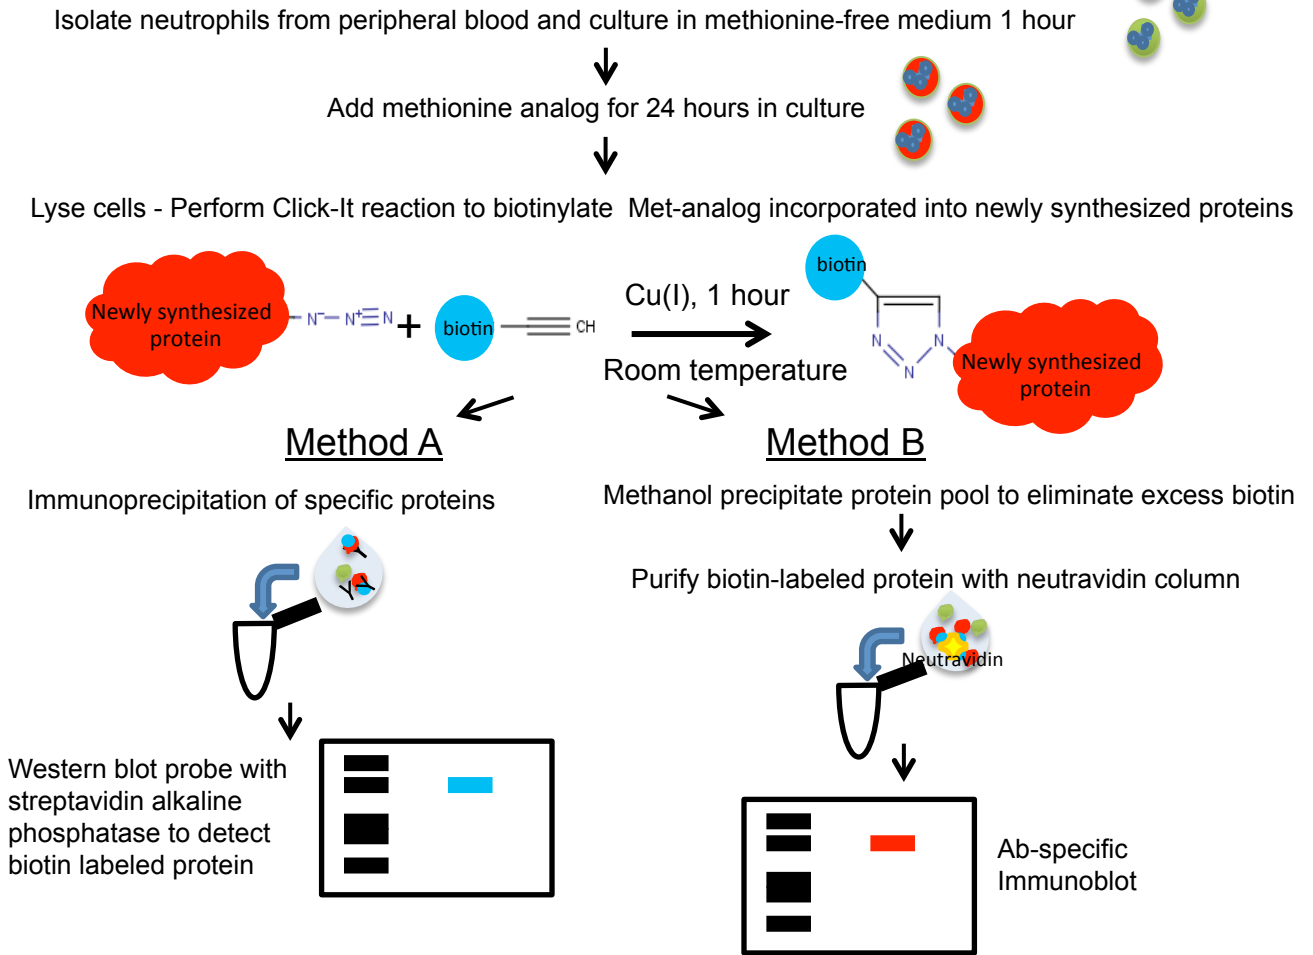

**Supplemental Figure 3.** Schematic of neutrophil protein synthesis analysis. Leukocytes were isolated from whole blood using HetaSep followed by a Histopaque 1077 gradient to isolate neutrophils. Red blood cells were lysed in hypotonic buffer. Neutrophils were incubated in a 5mL polypropylene tube in a volume of 500ul ( $6.6 \times 10^6$  cells/ mL) in methionine free RPMI1640 supplemented with 10% dialyzed FBS 1 hr to deplete methionine pools. Methionine analog L-azidohomoalanine (Invitrogen) (40uM) was added to medium and neutrophils were incubated 20 hours/37°C, 5% CO<sub>2</sub> under gentle agitation. Cells were lysed in 1% SDS 50mM Tris-HCl lysis buffer supplemented with EDTA Free Protease Inhibitor Cocktail (Roche), incubated on ice for 20 minutes and vortexed for 5 minutes. Lysate was sonicated to fragment DNA, centrifuged and transferred to a clean tube to remove insoluble cellular debris. Cell lysate volume was increased to 1mL using an IP buffer of NaCl, 1M HEPES, EDTA and .1% IPEGAL. Newly synthesized protein, which incorporated the methionine analog with an azide group, was biotinylated through the use of a biotin alkyne (Invitrogen) and the reaction was allowed to proceed at RT while rotating end over end for one hour. **Method A:** 4ug of anti-PR3 antibody (Santa Cruz H-60) or 4ug of anti-biotin antibody (Abcam, Cambridge, MA) was incubated overnight at 4C. Magnetic Protein A/G beads (40ul) (Pierce, 88802) were added 1 hour followed by 5X washes in IP buffer. Protein was eluted with 0.1% TFA for 45 minutes or 40ul of LDS loading buffer and boiling for 5 minutes respectively. pH was adjusted to 7.0 using 1M Tris HCl. **Method B:** Excess biotin was removed by a methanol chloroform precipitation or a desalting column. Biotinylated proteins were applied to streptavidin magnetic beads and incubated for 30 minutes at RT under gentle agitation. The beads were applied to a magnetic field and washed 6X in PBS supplemented with 1% BSA and 0.1% Tween 20. Samples were suspended in LDS loading buffer (Sigma) and electrophoresed on SDS-PAGE and blotted onto nitrocellulose membranes, blocked with 10% BSA in TBST for 1 hr, probed with streptavidin conjugated to alkaline phosphatase at a 1:1000 dilution or an antibody against PR3 (Supp Fig. 5) (MPO (Dako Carpinteria, CA)), or COX5B (Abcam), and visualized using Western Blue Stabilized Alkaline Phosphatase Substrate (Promega, Madison, WI)

## Supplemental Figure 4

### *PRTN3* gene locus

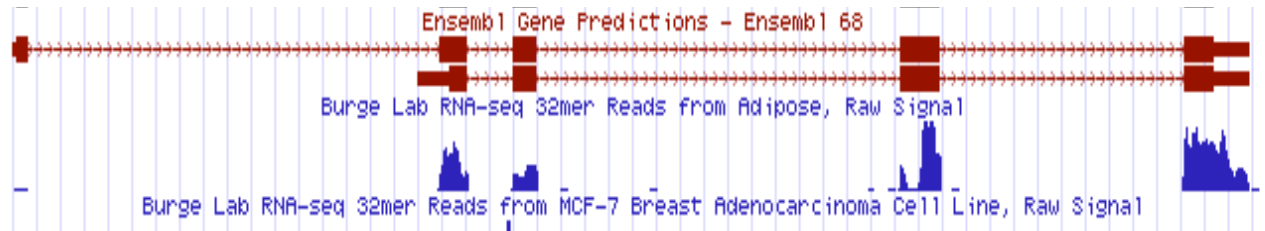

### *PRTN3*

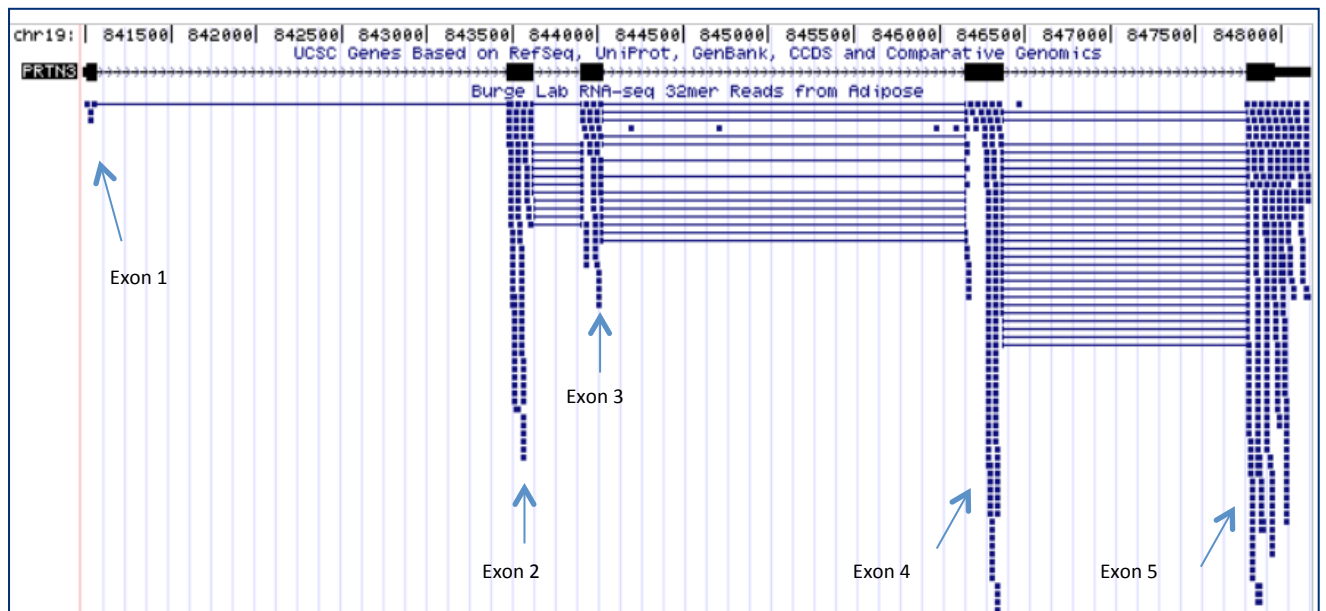

|                     |                                 |         |
|---------------------|---------------------------------|---------|
| <b>PRTN3-23-001</b> | <a href="#">ENST00000234347</a> | 1012 nt |
| <b>PRTN3-23-002</b> | <a href="#">ENST00000544537</a> | 1041 nt |

Supplemental Figure 3. Ensembl entry identifying a unique transcript from the *PRTN3* gene locus, expressed in adipose tissue and MCF7 breast epithelial cell.

## Supplemental Figure 5

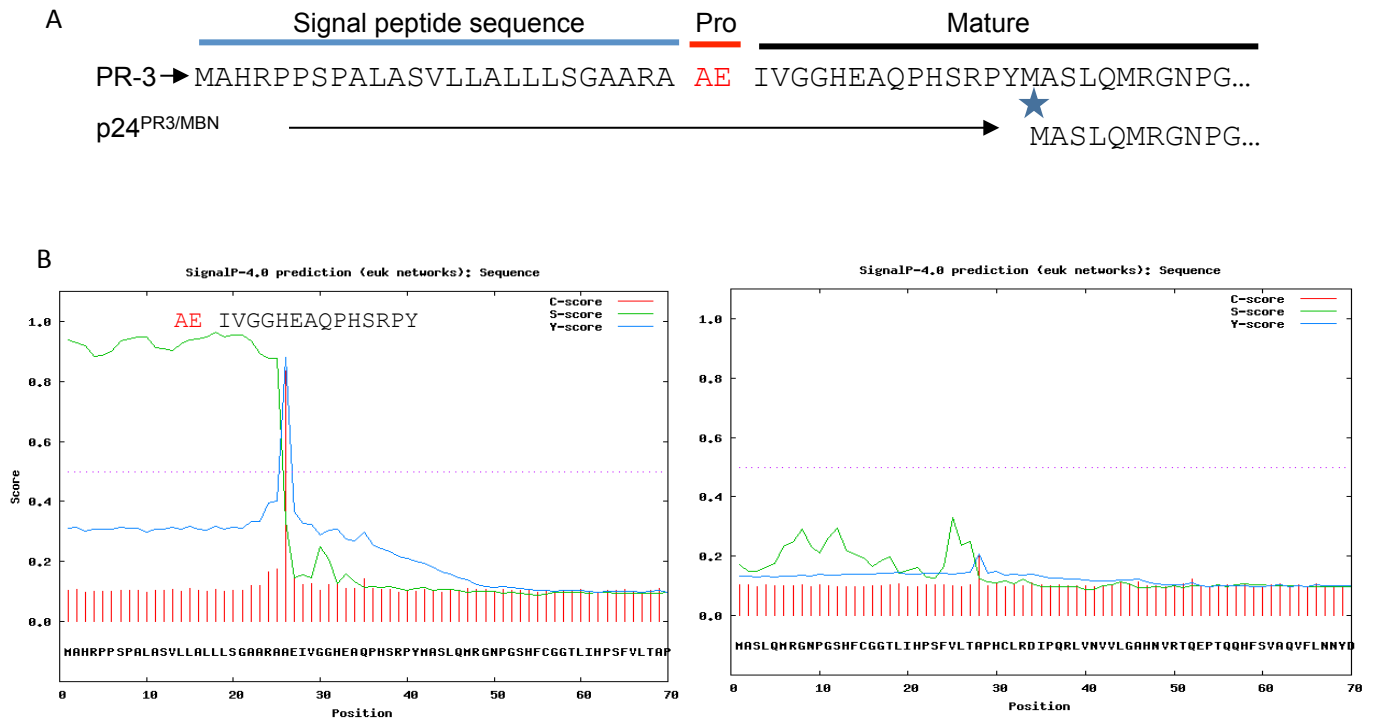

Supplemental Figure 6. In silico translation of *PRTN3-002* transcript indicates the protein lacks the signal peptide sequence present in PR3 that directs newly produced protein to the Golgi for posttranslational glycosylation. (B) bSignalP 4.0:Online tool verified sequence as a signal peptide: <http://www.cbs.dtu.dk/services/SignalP/> Thomas Nordahl Petersen, Søren Brunak, Gunnar von Heijne & Henrik Nielsen *Nature Methods*, **8**:785-786, 2011.

## Supplemental Figure 6

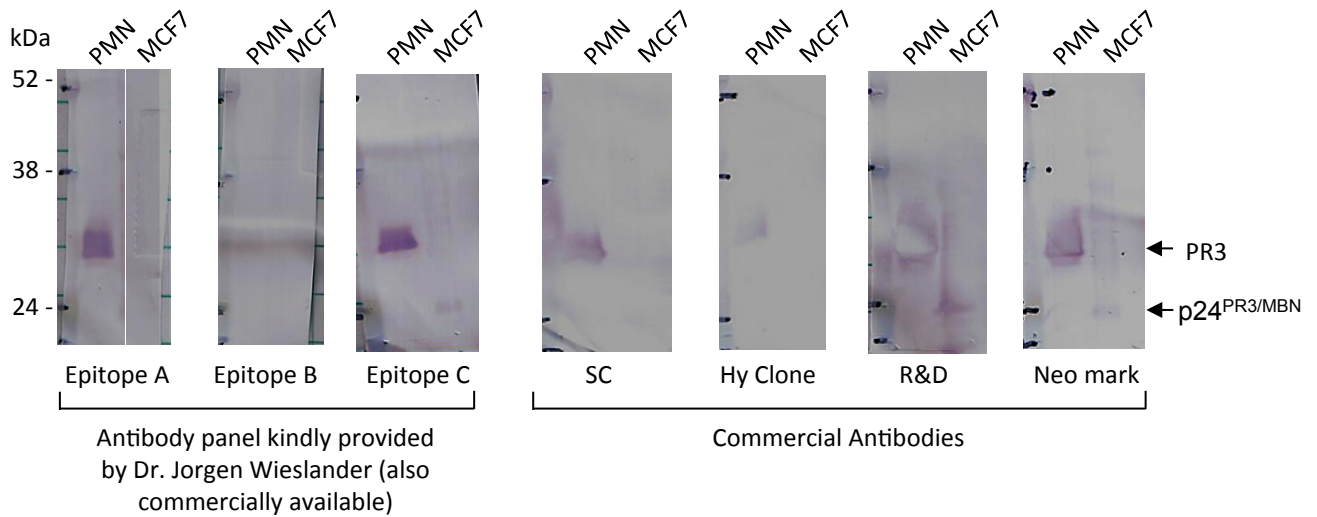

| Antibody   | Cat #      | Species |
|------------|------------|---------|
| Epitope A  | PR3.4A3    | Mouse   |
| Epitope B  | PR3.4A5    | Mouse   |
| Epitope C  | PR3.6A6    | Mouse   |
| Santa Cruz | Sc-28818   | Rabbit  |
| Hy Clone   | HM2172     | Mouse   |
| R&D        | AF6134     | Sheep   |
| Neo mark   | MS-1333-P1 | Mouse   |

Supplemental Figure 7. Identification of three anti-PR3 antibodies that are also reactive with the 24kDa p24<sup>PR3/MBN</sup> by western blot.







**Supplemental Table 2. Primers for northern probe, RT-PCR, 3'RACE, and Ligation anchored RT-PCR**

| <b>Primer Name</b>               | <b>Sequence</b>                                                             | <b>Product length</b> |
|----------------------------------|-----------------------------------------------------------------------------|-----------------------|
| <b>Northern probe</b>            |                                                                             |                       |
| PR3 336 exon 3                   | 5'-GGT GTT TCT GAA CAA CTA CGA C-3'                                         | 292bp                 |
| PR3 627 exon 5                   | 5'-TCC GAA GCA GAT GCC GGC CTT-3'                                           |                       |
| <b>Taqman and RT-PCR primers</b> |                                                                             |                       |
| PR3 FOR ds exon 4                | 5'-TGT CAC CGT GGT CAC CTT CTT-3'                                           | 147bp                 |
| PR3 REV ds exon 5                | 5'-CCC CAG ATC ACG AAG GAG TCT AT-3'                                        |                       |
| PR3 probe exon 4                 | FAM-TTG CAC TTT CGT CCC TCG CCG-TAMRA                                       |                       |
| PR3 sense (exon 1 FOR)           | 5'-GAC CCC ACC ATG GCT CAC-3'                                               | 189bp                 |
| PR3 antisense                    | 5'-CAA GGT GCC TCC GCA GAA-3'                                               |                       |
| PRTN3-002 sense                  | 5'-ATC GGG AGA CGG AGG CTC-3'                                               | 298bp                 |
| PRTN3-002 antisense              | 5'-CTC CGA GCA CCA CGT TCA-3'                                               |                       |
| Cyclophilin FOR                  | 5'-AGG CAG GAA AAG CAA GGA GCC A-3'                                         | 582bp                 |
| Cyclophilin REV                  | 5'-TCA CTG CAG GTA GTC TGC GCC-3'                                           |                       |
| PR3 sense (exon 1 FOR)           | 5'-GAC CCC ACC ATG GCT CAC-3'                                               | 986bp                 |
| PR3 exon 5, 3'UTR REV            | 5'-GGA GTT TCA ACG TTT ATT GAG GTC AC-3'                                    |                       |
| PRTN3-002 intron 1 FOR           | 5'-GTT GCA GAT CGG GAG ACG-3'                                               | 1023bp                |
| PR3 exon 5, 3'UTR REV            | 5'-GGA GTT TCA ACG TTT ATT GAG GTC AC-3'                                    |                       |
| <b>3' RACE primers</b>           |                                                                             |                       |
| PR3 374 exon 3 FOR               | 5'-ACG ACG TTC TCC TCA TCC AG-3'                                            |                       |
| PR3 547 exon 4 FOR               | 5'-GTC ACC GTG GTC ACC TTC TT-3'                                            | ~500bp and ~580bp     |
| PR3 617 exon 5 FOR               | 5'-TCT GCT TCG GAG ACT CAG GT-3'                                            | ~420bp and ~500bp     |
| PR3 634 exon 5 FOR               | 5'-GGT GGC CCC CTG ATC TGT GAT G-3'                                         | ~400bp and ~480bp     |
| Qo                               | 5'-CCA GTG AGC AGA GTG ACG-3'                                               |                       |
| Qi                               | 5'-GAG GAC TCG AGC TCA ACG-3'                                               |                       |
| Qt                               | 5'-CCA GTG AGC AGA GTG ACG AGG ACT CGA GCT CAA GCT TTT TTT TTT TTT TTT T-3' |                       |
